# Supplementary material for: Short-Term Metformin Treatment Enriches Bacteroides dorei in an Obese Liver Steatosis Zucker Rat Model
Source: PubMed Central journal article supplement (PMC9006818; doi:10.3389/fmicb.2022.834776), 2022-03-30

## Study Design

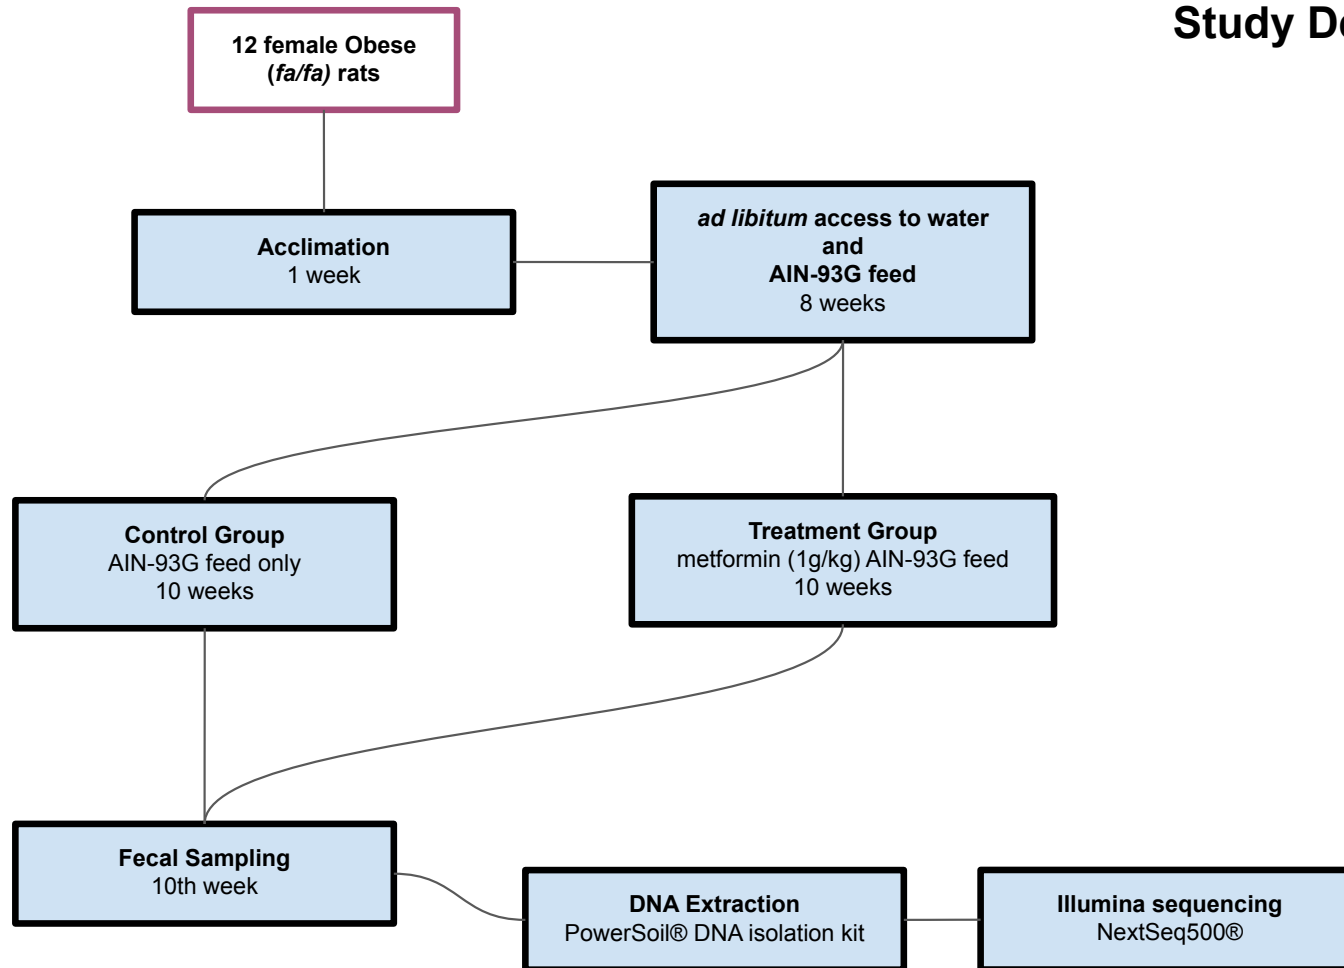

Supplement: Image_1.pdf [file Image_1.pdf]
